# Supplementary material for: Resistance and Aerobic Training Were Effective in Activating Different Markers of the Browning Process in Obesity
Source: MDPI journal article supplement (doi:10.3390/ijms25010275), 2023-12-24
Supplement: s1 [file s1]

| +Individual data (manuscript)                  |          |          |          |          |
|------------------------------------------------|----------|----------|----------|----------|
| Reference - FIGURE 1                           |          |          |          |          |
| Adiposity (g/100g)                             |          |          |          |          |
| CS                                             | HS       | AE       | RE       | CE       |
| 2.939116                                       | 6.730815 | 1.919947 | 3.588460 | 5.497984 |
| 2.947404                                       | 7.930396 | 1.941654 | 3.555553 | 2.353723 |
| 2.900901                                       | 7.656498 | 2.440429 | 3.314105 | 1.710892 |
| 3.481206                                       | 7.805010 | 3.981702 | 2.603161 | 1.974469 |
| 2.938800                                       | 5.228406 | 4.393082 | 3.221769 | 3.883486 |
| 2.401823                                       | 8.695893 | 3.058468 | 4.588914 | 2.879653 |
|                                                | 7.106475 | 2.758796 |          | 3.664302 |
|                                                |          | 3.608816 |          | 4.590161 |
| Weight delta (grams)                           |          |          |          |          |
| 133                                            | 235      | 101      | 159      | 183      |
| 147                                            | 217      | 112      | 170      | 165      |
| 186                                            | 256      | 192      | 150      | 121      |
| 163                                            | 231      | 177      | 110      | 173      |
| 146                                            | 208      | 192      | 159      | 170      |
| 178                                            | 212      | 169      | 195      | 124      |
| 107                                            | 278      | 125      | 171      | 165      |
|                                                | 280      | 189      |          | 201      |
|                                                |          | 145      |          |          |
| Total carcass fat (g/100g)                     |          |          |          |          |
| 8.01880                                        | 20.39179 | 6.51147  | 8.34083  | 8.11499  |
| 11.64421                                       | 21.74861 | 9.18428  | 10.83676 | 5.67828  |
| 11.66592                                       | 17.90088 | 5.96716  | 7.58588  | 7.36573  |
| 8.95375                                        | 24.69560 | 10.66671 | 8.48707  | 6.26455  |
| 12.00006                                       | 11.01054 | 7.32521  | 6.18199  | 13.51245 |
| 8.69925                                        |          |          | 11.76056 | 6.73556  |
|                                                |          |          | 8.49867  | 9.29976  |
| Cumulative Caloric Intake Total (kcal) (Weeks) |          |          |          |          |
| 3728.13                                        | 3294.0   | 4325.19  | 3451.74  | 4341.37  |
| 3871.63                                        | 3290.4   | 4415.77  | 3652.31  | 4292.84  |
| 4152.89                                        | 3848.4   | 4312.25  | 4150.50  | 3904.64  |
| 3840.06                                        | 3837.6   | 4150.50  | 4076.10  | 4001.69  |
|                                                |          | 3827.00  |          |          |

| Individual data (manuscript) |  |  |  |  |  |  |  |  |     |  |  |  |  |  |  |  |
|------------------------------|--|--|--|--|--|--|--|--|-----|--|--|--|--|--|--|--|
| Reference - FIGURE 2         |  |  |  |  |  |  |  |  |     |  |  |  |  |  |  |  |
| Final load (grams)           |  |  |  |  |  |  |  |  |     |  |  |  |  |  |  |  |
| RE                           |  |  |  |  |  |  |  |  | CE  |  |  |  |  |  |  |  |
| 1122                         |  |  |  |  |  |  |  |  | 730 |  |  |  |  |  |  |  |
| 1080                         |  |  |  |  |  |  |  |  | 562 |  |  |  |  |  |  |  |
| 1045                         |  |  |  |  |  |  |  |  | 864 |  |  |  |  |  |  |  |
| 1004                         |  |  |  |  |  |  |  |  | 825 |  |  |  |  |  |  |  |
| 1672                         |  |  |  |  |  |  |  |  | 676 |  |  |  |  |  |  |  |
| 1434                         |  |  |  |  |  |  |  |  | 960 |  |  |  |  |  |  |  |
| 1233                         |  |  |  |  |  |  |  |  | 860 |  |  |  |  |  |  |  |
| 1549                         |  |  |  |  |  |  |  |  | 854 |  |  |  |  |  |  |  |
|                              |  |  |  |  |  |  |  |  | 898 |  |  |  |  |  |  |  |

| Strength training progression (grams) |      |      |      |      |      |      |      |      |     |     |     |     |     |     |     |     |     |
|---------------------------------------|------|------|------|------|------|------|------|------|-----|-----|-----|-----|-----|-----|-----|-----|-----|
| RE                                    |      |      |      |      |      |      |      |      | CE  |     |     |     |     |     |     |     |     |
| 1                                     | 560  | 630  | 683  | 615  | 688  | 684  | 573  | 649  | 400 | 382 | 324 | 465 | 406 | 360 | 380 | 394 | 538 |
| 2                                     | 740  | 840  | 773  | 705  | 988  | 894  | 813  | 949  | 400 | 382 | 324 | 465 | 406 | 360 | 380 | 494 | 538 |
| 3                                     | 800  | 900  | 803  | 825  | 1258 | 1104 | 843  | 1129 | 400 | 382 | 324 | 465 | 406 | 360 | 380 | 494 | 538 |
| 4                                     | 950  | 1020 | 923  | 1005 | 1462 | 1194 | 933  | 1339 | 550 | 502 | 624 | 675 | 526 | 690 | 650 | 674 | 778 |
| 5                                     | 882  | 1140 | 715  | 1035 | 1522 | 1284 | 1053 | 1429 | 550 | 502 | 624 | 675 | 526 | 690 | 650 | 674 | 778 |
| 6                                     | 1032 | 1200 | 955  | 1125 | 1612 | 1344 | 1113 | 1489 | 550 | 502 | 624 | 675 | 526 | 690 | 650 | 674 | 778 |
| 7                                     | 1092 | 1200 | 1015 | 1125 | 1612 | 1344 | 1173 | 1519 | 550 | 502 | 624 | 675 | 526 | 690 | 650 | 674 | 778 |
| 8                                     | 1122 | 1080 | 1045 | 1004 | 1672 | 1434 | 1233 | 1549 | 730 | 562 | 864 | 825 | 676 | 960 | 860 | 854 | 898 |

| Progression of aerobic capacity – Speed (m/min) |    |    |    |    |    |    |    |    |    |    |    |    |    |    |    |    |    |    |
|-------------------------------------------------|----|----|----|----|----|----|----|----|----|----|----|----|----|----|----|----|----|----|
| AE                                              |    |    |    |    |    |    |    |    |    | CE |    |    |    |    |    |    |    |    |
| Basal                                           | 30 | 35 | 30 | 25 | 30 | 30 | 15 | 15 | 25 | 25 | 25 | 35 | 30 | 30 | 15 | 15 | 15 | 20 |
| 4 Weeks                                         | 35 | 30 | 45 | 45 | 40 | 40 | 35 | 30 | 35 | 25 | 25 | 30 | 25 | 40 | 30 | 25 | 30 | 30 |
| 8 Weeks                                         | 50 | 45 | 45 | 40 | 45 | 50 | 30 | 40 | 30 | 35 | 35 | 40 | 35 | 35 | 40 | 35 | 35 | 30 |

| Progression of aerobic capacity – Distance (m) |      |      |      |      |      |      |     |     |     |     |     |     |     |     |     |     |     |     |
|------------------------------------------------|------|------|------|------|------|------|-----|-----|-----|-----|-----|-----|-----|-----|-----|-----|-----|-----|
| AE                                             |      |      |      |      |      |      |     |     |     | CE  |     |     |     |     |     |     |     |     |
| Basal                                          | 396  | 532  | 549  | 310  | 459  | 456  | 480 | 96  | 325 | 360 | 310 | 637 | 480 | 429 | 108 | 108 | 97  | 182 |
| 4 Weeks                                        | 640  | 456  | 1143 | 1147 | 848  | 896  | 856 | 489 | 682 | 377 | 350 | 462 | 335 | 960 | 486 | 360 | 519 | 489 |
| 8 Weeks                                        | 1410 | 1215 | 1057 | 920  | 1080 | 1600 | 519 | 856 | 519 | 672 | 679 | 880 | 668 | 700 | 852 | 665 | 640 | 489 |

| Individual data (manuscript)                                  |         |         |         |         |
|---------------------------------------------------------------|---------|---------|---------|---------|
| Reference – FIGURE 3                                          |         |         |         |         |
| Adipose tissue irisin levels (ng/μg of total protein content) |         |         |         |         |
| RET                                                           |         |         |         |         |
| CS                                                            | HS      | AE      | RE      | CE      |
| 0.01866                                                       | 0.00000 | 0.00766 | 0.01505 | 0.00744 |
| 0.01897                                                       | 0.00000 | 0.01578 | 0.00258 | 0.01997 |
| 0.01717                                                       | 0.00820 | 0.00349 | 0.11221 | 0.00531 |
| 0.00212                                                       | 0.00157 | 0.01781 | 0.03000 | 0.01405 |
| 0.00167                                                       | 0.00000 | 0.01835 | 0.03118 | 0.00690 |
| 0.00089                                                       | 0.00000 | 0.01204 |         | 0.01255 |
|                                                               | 0.02049 | 0.00372 |         | 0.03331 |
| MES                                                           |         |         |         |         |
| 0.01360                                                       | 0.00000 | 0.07451 | 0.01456 | 0.02135 |
| 0.01729                                                       | 0.00000 | 0.08111 | 0.07404 | 0.02527 |
| 0.01052                                                       | 0.01574 | 0.04011 | 0.06234 | 0.06565 |
| 0.00458                                                       | 0.01386 | 0.09285 | 0.04005 | 0.06110 |
| 0.00483                                                       | 0.01083 | 0.01929 | 0.02975 | 0.02776 |
|                                                               | 0.07425 | 0.01781 |         | 0.02529 |
|                                                               | 0.05495 | 0.07739 |         | 0.03589 |
|                                                               |         |         |         | 0.09133 |
| SUB                                                           |         |         |         |         |
| 0.00716                                                       | 0.04340 | 0.03784 | 0.04399 | 0.04396 |
| 0.04054                                                       | 0.03938 | 0.04309 | 0.04826 | 0.03692 |
| 0.00797                                                       | 0.00722 | 0.03938 | 0.05038 | 0.00926 |
| 0.01027                                                       | 0.03628 | 0.01288 | 0.06495 | 0.00925 |
| 0.00850                                                       | 0.03830 | 0.03016 | 0.06286 | 0.03626 |
|                                                               | 0.01958 | 0.06406 |         | 0.07950 |
|                                                               |         |         |         | 0.05131 |
|                                                               |         |         |         | 0.04782 |

| Individual data (manuscript)                                 |         |         |         |         |
|--------------------------------------------------------------|---------|---------|---------|---------|
| Reference - FIGURE 4                                         |         |         |         |         |
| Adipose tissue FGF21 levels (ng/μg of total protein content) |         |         |         |         |
| RET                                                          |         |         |         |         |
| CS                                                           | HS      | AE      | RE      | CE      |
| 0.26963                                                      | 0.24645 | 0.35263 | 0.50203 | 0.35544 |
| 0.25791                                                      | 0.30981 | 0.45166 | 3.18788 | 0.28018 |
| 0.21057                                                      | 0.31766 | 0.62753 | 5.42747 | 0.53670 |
| 0.27179                                                      | 0.31090 | 0.48989 | 4.22827 | 0.51967 |
| 0.36310                                                      | 0.65046 | 4.37365 | 3.51680 | 2.10014 |
| 0.42519                                                      | 0.43794 | 3.59923 |         | 5.34196 |
|                                                              |         | 4.41755 |         | 3.07844 |
| MES                                                          |         |         |         |         |
| 2.87107                                                      | 4.83792 | 2.50440 | 1.93494 | 4.76329 |
| 3.20342                                                      | 3.59017 | 2.10452 | 2.00928 | 1.24130 |
| 2.91981                                                      | 8.07143 | 1.49518 | 2.33006 | 1.99098 |
| 2.86311                                                      | 2.96380 | 1.83873 | 3.00060 | 1.72682 |
| 2.24978                                                      | 8.33060 | 1.76459 | 2.99966 | 1.56030 |
| 2.05351                                                      | 4.25275 | 1.54915 | 4.34107 | 1.44751 |
| 1.95967                                                      |         | 1.47631 | 1.85062 | 2.76480 |
|                                                              |         | 3.11802 |         | 2.62317 |
| SUB                                                          |         |         |         |         |
| 1.01495                                                      | 0.57952 | 0.19118 | 0.51183 | 0.27836 |
| 0.11453                                                      | 0.28257 | 0.61221 | 0.57055 | 0.68637 |
| 0.21583                                                      | 0.47483 | 0.72229 | 2.36639 | 0.09257 |
| 0.24788                                                      | 0.10683 | 0.64448 | 2.41846 | 0.12906 |
| 0.45208                                                      | 0.36192 | 0.40227 | 2.83199 | 0.81326 |
| 0.12664                                                      | 0.43953 | 0.86528 | 0.93236 | 2.82880 |
|                                                              | 0.20852 | 2.12809 |         | 1.65691 |
|                                                              |         | 1.64733 |         | 1.74780 |

| Individual data (manuscript)                                  |           |           |           |           |
|---------------------------------------------------------------|-----------|-----------|-----------|-----------|
| Reference - FIGURE 5                                          |           |           |           |           |
| Mesenteric adipose tissue protein content by Western blotting |           |           |           |           |
| PGC1 $\alpha$                                                 |           |           |           |           |
| CS                                                            | HS        | AE        | RE        | CE        |
| 65.56858                                                      | 28.95870  | 122.43510 | 134.31190 | 104.58650 |
| 134.43140                                                     | 142.65330 | 136.03560 | 248.37590 | 162.66440 |
| 132.86600                                                     | 67.99791  | 213.06200 | 202.66430 | 103.21110 |
| 67.13400                                                      | 83.56813  | 101.05420 | 148.17200 | 120.64700 |
| 58.80135                                                      |           | 125.03640 | 140.08460 | 110.74700 |
| 100.00000                                                     |           |           |           |           |
| PPAR $\gamma$                                                 |           |           |           |           |
| 95.63132                                                      | 81.50383  | 189.85480 | 142.12860 | 119.16310 |
| 99.96712                                                      | 125.98950 | 95.89071  | 255.06040 | 81.07030  |
| 100.03290                                                     | 24.87402  | 90.48955  | 111.97380 | 99.67004  |
| 64.68666                                                      | 90.47100  | 93.33772  | 143.49980 | 140.34990 |
| 100.00000                                                     |           | 92.08682  |           | 90.74310  |
|                                                               |           | 121.84660 |           |           |
| UCP1                                                          |           |           |           |           |
| 87.16769                                                      | 49.35711  | 124.94850 | 94.43144  | 132.65830 |
| 112.83230                                                     | 75.13518  | 86.33322  | 94.69455  | 86.91026  |
| 79.15746                                                      | 65.10129  | 101.18200 | 69.84528  | 75.84942  |
| 120.84250                                                     | 52.68858  | 146.31850 | 92.25698  | 83.24644  |
| 78.77081                                                      |           | 83.07359  | 79.91333  | 90.81480  |
| 100.00000                                                     |           |           | 105.66240 |           |

| Individual data (manuscript)                                    |           |           |           |           |
|-----------------------------------------------------------------|-----------|-----------|-----------|-----------|
| Reference - FIGURE 6                                            |           |           |           |           |
| Subcutaneous adipose tissue protein content by Western blotting |           |           |           |           |
| PGC1 $\alpha$                                                   |           |           |           |           |
| CS                                                              | HS        | AE        | RE        | CE        |
| 74.85400                                                        | 71.67929  | 74.38078  | 119.86810 | 92.28613  |
| 72.58539                                                        | 78.76723  | 70.33540  | 83.23515  | 82.76341  |
| 90.20462                                                        | 66.44175  | 88.36640  | 143.04490 | 84.11970  |
| 109.79540                                                       | 91.61154  | 114.16660 | 128.98870 | 97.82430  |
| 100.00000                                                       | 90.85936  | 120.29210 | 107.01640 | 100.86630 |
|                                                                 | 93.97688  | 91.02351  | 136.26360 | 112.45500 |
| PPAR $\gamma$                                                   |           |           |           |           |
| 80.57787                                                        | 83.87445  | 83.99614  | 89.66069  | 83.11753  |
| 57.69430                                                        | 83.66619  | 75.67892  | 152.84960 | 102.48120 |
| 88.32539                                                        | 100.41470 | 84.97770  | 92.82798  | 95.21394  |
| 111.67460                                                       | 88.50230  | 122.07290 | 106.14270 | 84.42376  |
| 100.00000                                                       | 100.15680 | 96.29208  | 158.12760 | 95.66499  |
|                                                                 |           |           |           | 107.95580 |
|                                                                 |           |           |           | 110.41260 |
| UCP1                                                            |           |           |           |           |
| 45.71877                                                        | 23.81362  | 72.55727  | 131.83510 | 96.18973  |
| 154.28120                                                       | 96.20131  | 123.04130 | 134.76830 | 90.60760  |
| 50.98295                                                        | 74.17028  | 255.29780 | 96.87370  | 230.20680 |
| 88.15093                                                        | 108.66760 | 135.64930 | 225.81100 | 204.87130 |
| 100.00000                                                       |           |           | 241.96360 | 185.85060 |
